# Supplementary material for: Timing and Predictors of Loss of Infectivity among Healthcare Workers with Primary and Recurrent COVID-19: a Prospective Observational Cohort Study
Source: medRxiv preprint, doi:10.1101/2023.06.16.23291449, version 1 (2023-06-18)
Supplement: Appendix [file 291449_file02.docx]

**Supplemental Online Content**

Dzieciolowska S, Charest H, Roy T et al. Timing and Predictors of Loss of Infectivity among Healthcare Workers with Primary and Recurrent COVID-19: a Prospective Observational Cohort Study

**eMethods.** Whole Genome Sequencing

**eFIGURE 1.** Performance of return-to-work criteria for healthcare workers with recurrent COVID-19 on the fifth day of their infection

This supplemental material has been provided by the authors to give readers additional information about their work.**eMethods**

**Whole Genome Sequencing and Sequence Data Analysis**

Nucleic acids were extracted from 0.2-mL aliquots using the NUCLISENS easyMAG (bioMérieux, Marcy-lʼÉtoile, France). The viral RNA was sequenced using Illumina technology, and a targeted SARS-CoV-2 amplification strategy was employed based on the ARTIC V4.1 primer scheme.1 Libraries were prepared with the Illumina COVIDSeq Test kit according to manufacturer’s recommendation2 and sequenced with a NextSeq 1000 (Illumina). Data analysis was conducted using the GenPipes Covseq pipeline,3 which performed alignment and produced variant calls. Initially, host reads were removed by aligning them to a hybrid reference consisting of human (GRCh38) and Wuhan-Hu-1 SARS-CoV-2 reference (MN908947.3) sequences. Raw reads were trimmed using cutadapt (v2.10), and then aligned to the reference using bwa-mem (v0.7.17).4 The resulting aligned reads were filtered using sambamba (v0.7.0),5 which removed paired reads with insert sizes outside the 60-300 bp range, unmapped reads, and all secondary alignments. Remaining ARTIC primers (v4.1) were trimmed using iVar (v1.3).6 To generate a consensus sequence, a pileup was produced using Samtools (v1.12),7 which was then used as input for FreeBayes (v1.3.4) to create a consensus sequence for regions with a minimum of 10× depth and using reads with a Q score > 20.8 Mutations were annotated with snpEff (v4.5).9 Single nucleotide variants below 5% allele frequency were filtered out. A full description of the process can be found here:

<https://c3g.github.io/covseq_McGill/SARS_CoV2_Sequencing/Illumina_overview.html>.

**Variant identification and detection of recombination**

Variant identification was performed using the Pangolin program (v4.2, UShER analysis mode),10 and the program ncov-recombinant (v.0.6.0) was used to characterize recombinant lineages non-identified by Pangolin.11

**eMethods References**

1. Initial implementation of an ARTIC bioinformatics platform for nanopore sequencing of nCoV2019 novel coronavirus. <https://github.com/artic-network/artic-ncov2019>, Accessed March 14, 2023.

2. Illumina COVIDSeq Test Instructions for Use. <https://support.illumina.com/downloads/illumina-covidseq-test-instructions-for-use-1000000128490.html>. Accessed March 14, 2023.

3. CoV Sequencing Pipeline. <https://genpipes.readthedocs.io/en/genpipes-v4.1.2/user_guide/pipelines/gp_covseq.html>, 2019.

4. Li H, Durbin R. Fast and accurate short read alignment with Burrows-Wheeler transform. *Bioinformatics*. Jul 15 2009;25(14):1754-60. doi:10.1093/bioinformatics/btp324

5. Tarasov A, Vilella AJ, Cuppen E, Nijman IJ, Prins P. Sambamba: fast processing of NGS alignment formats. *Bioinformatics*. Jun 15 2015;31(12):2032-4. doi:10.1093/bioinformatics/btv098

6. Castellano S, Cestari F, Faglioni G, et al. iVar, an Interpretation-Oriented Tool to Manage the Update and Revision of Variant Annotation and Classification. *Genes (Basel)*. Mar 8 2021;12(3)doi:10.3390/genes12030384

7. Li H, Handsaker B, Wysoker A, et al. The Sequence Alignment/Map format and SAMtools. *Bioinformatics*. Aug 15 2009;25(16):2078-9. doi:10.1093/bioinformatics/btp352

8. Garrison E, Marth G. Haplotype-based variant detection from short-read sequencing. *arXiv preprint arXiv:12073907*. 2012;

9. Cingolani P, Platts A, Wang le L, et al. A program for annotating and predicting the effects of single nucleotide polymorphisms, SnpEff: SNPs in the genome of Drosophila melanogaster strain w1118; iso-2; iso-3. *Fly (Austin)*. Apr-Jun 2012;6(2):80-92. doi:10.4161/fly.19695

10. O'Toole A, Scher E, Underwood A, et al. Assignment of epidemiological lineages in an emerging pandemic using the pangolin tool. *Virus Evol*. 2021;7(2):veab064. doi:10.1093/ve/veab064

11. ktmeaton/ncov-recombinant. <https://github.com/ktmeaton/ncov-recombinant>, 2023.
